# Supplementary material for: A Critical Appraisal of Emergency Medicine Specialty Training and Resignation among Residents in Emergency Medicine in Turkey
Source: Hindawi journal article supplement (doi:10.1155/2019/6197618), 2019-02-17
Supplement: f1 [file 6197618.f1.pdf]

## **A Critical Appraisal of Emergency Medicine Specialty Training and Resignation among Residents in Emergency Medicine in Turkey**

### **Gender?**

Male

Female

### **Age?**

<30 year

30-35

36 year and  
older

### **Are you married?**

Married

Single

Divorced

### **What is the faculty you graduated from?**

Adnan Menderes University Faculty of Medicine

Afyonkarahisar Kocatepe University Faculty of Medicine

Akdeniz University Faculty of Medicine

Ankara University Faculty of Medicine

Atatürk University Faculty of Medicine

Balıkesir University Faculty of Medicine

Başkent University Faculty of Medicine

Bolu İzzet Baysal University Faculty of Medicine

Celal Bayar University Faculty of Medicine

Cumhuriyet University Faculty of Medicine

Çanakkale Onsekiz Mart University Faculty of Medicine

Çukurova University Faculty of Medicine

Dicle University Faculty of Medicine

Dokuz Eylül University Faculty of Medicine

Other  \_\_\_\_\_

**Have you worked as an assistant in another area of expertise prior to emergency medicine resident?**

- Yes
- No

**Did you know about emergency medicine before you were an resident?**

- Yes
- No
- A little

**What branch of emergency medicine did you win in Examination for Specialty in Medicine (TUS)?**

- 1
- 2
- 3
- 4
- 5 ≥

**What is your preference for emergency medicine?**

- 1
- 2
- 3
- 4
- 5
- 6
- 7
- 8
- 9
- 10 ≥

**What kind of clinic you worked as an emergency medicine resident?**

- University Hospital (State)
- University Hospital (Non-state)
- Ministry of Health Education Research Hospital
- I worked in multiple clinics

**The clinic in which you resigned is in which region of Turkey?**

- |                    |                          |
|--------------------|--------------------------|
| Marmara            | <input type="checkbox"/> |
| Mediterranean      | <input type="checkbox"/> |
| Blacksea           | <input type="checkbox"/> |
| Aegean             | <input type="checkbox"/> |
| Central Anatolia   | <input type="checkbox"/> |
| East               | <input type="checkbox"/> |
| Southeast Anatolia | <input type="checkbox"/> |

**How long did you work at the emergency medicine clinic where you resigned?**

- |                    |                          |
|--------------------|--------------------------|
| Less than 24 hours | <input type="checkbox"/> |
| 1 day-7 days       | <input type="checkbox"/> |
| 8 Days-30 days     | <input type="checkbox"/> |
| 31 days-6 months   | <input type="checkbox"/> |
| 7 months-1 year    | <input type="checkbox"/> |
| More than 1 year   | <input type="checkbox"/> |

**How many emergency medicine professionals/faculty were there in the clinic you worked with?**

- |          |                          |
|----------|--------------------------|
| 0        | <input type="checkbox"/> |
| 1        | <input type="checkbox"/> |
| 2-4      | <input type="checkbox"/> |
| 5 $\geq$ | <input type="checkbox"/> |

**How many residents were there at the emergency medicine clinic you worked with?**

- |       |                          |
|-------|--------------------------|
| 5<    | <input type="checkbox"/> |
| 5-10  | <input type="checkbox"/> |
| 11-20 | <input type="checkbox"/> |
| 21-30 | <input type="checkbox"/> |
| 30>   | <input type="checkbox"/> |

**Did you regret after you resigned?**

- |     |                          |
|-----|--------------------------|
| Yes | <input type="checkbox"/> |
| No  | <input type="checkbox"/> |

**Did you receive regular training at your clinic?**

Yes

No

**Accessibility to the full-text scientific publications?**

Yes

No

**Participation to any scientific activity (meeting/course) during fellowship?**

Yes

No

**Regular rotation program in the department?**

Yes

No

**Do you think that your department had deficits in EMST?**

Yes

No

Enough

**Did specialists/academic staff actively took part in patient management?**

Yes

No

**Have you been exposed to any verbal or physical violence in your department?**

Yes

No

**Did you take any psychological support during residency?**

Yes

No

**What is your current occupation?**

- Working at a different specialty training program
- General practitioner
- Preparing to TUS
- Working at another emergency department
- Working at a different specialty training program

**İstifa sonrası bir uzmanlık alanında asistan iseniz uzmanlık alanı nedir?**

- Emergency Medicine
- Forensic Medicine
- Family Medicine
- Anatomy
- Anesthesiology and Reanimation
- Brain and nerve surgery
- Pediatric Surgery
- Child Health and Diseases
- Child and Adolescent Mental Health and Diseases
- Skin and Venereal Diseases
- Infectious Diseases and Clinical Microbiology
- Physical Medicine and Rehabilitation
- General Surgery
- Thoracic Surgery
- Other  \_\_\_\_\_

**Causes of resignation from EMST?**

- Violence / security concerns
- Busy work environment
- Inadequate training
- Realizing that emergency medicine is a wrong choice
- Mobbing from academic staff
- Mobbing from senior fellows
- Mobbing from administrative staff
- Family-related issues
- Insufficient number of academic staff
- Financial issues
- Other
